# Supplementary material
Source: Springer Nature journal article supplement (https://www.springermedizin.de/resource/supplementary/12937_2010_358_MOESM2_ESM.pdf/25653220)

Modern diet score

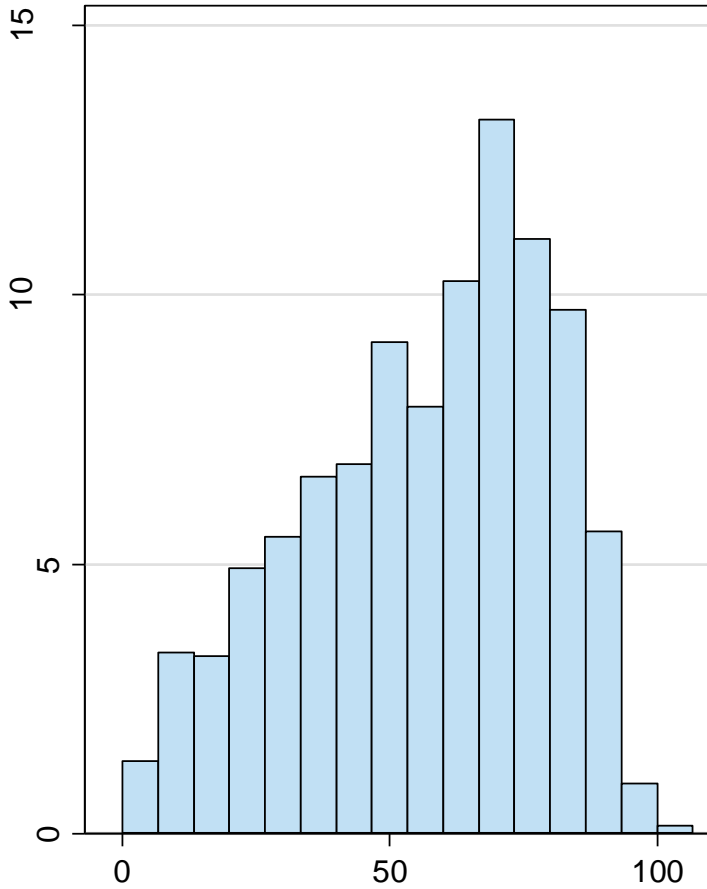

Meat-fish diet score

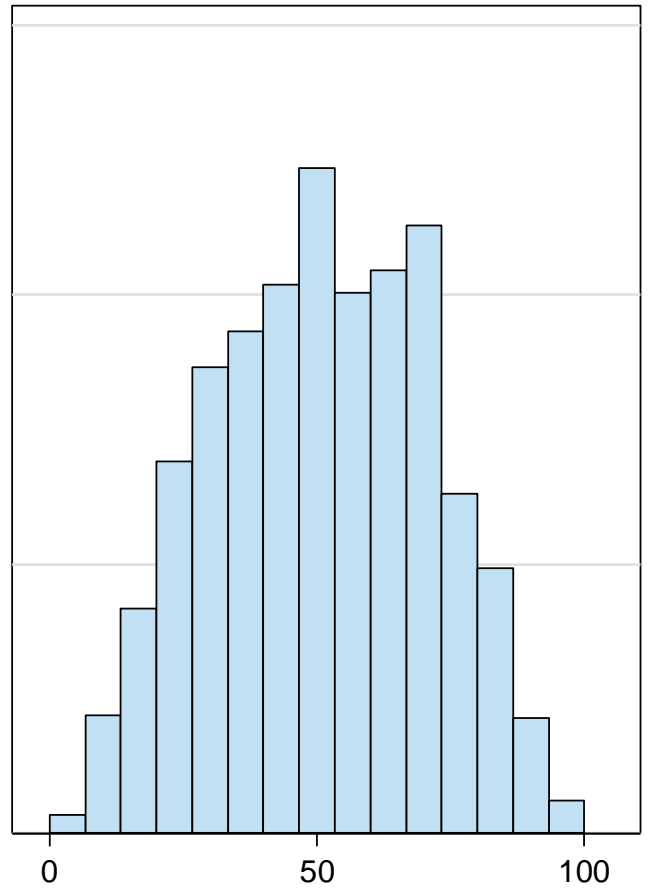

Diet score values (0-100)

Supplement: MOESM2 [file 25653220]
